1 Plasma after both SARS-CoV-2 boosted vaccination and COVID-19 potentially neutralizes BQ.1.1  
2 and XBB.1

3  
4 David J Sullivan<sup>1</sup>, Massimo Franchini<sup>2</sup>, Jonathon W. Senefeld<sup>3</sup>, Michael J. Joyner<sup>3</sup>, Arturo  
5 Casadevall<sup>1</sup>, Daniele Focosi<sup>4</sup>

6  
7 <sup>1</sup>Johns Hopkins Bloomberg School of Public Health and School of Medicine, Baltimore, MD  
8 21218, USA; [dsulliv7@jhmi.edu](mailto:dsulliv7@jhmi.edu); [acasadel@jhu.edu](mailto:acasadel@jhu.edu)

9 <sup>2</sup>Division of Transfusion Medicine, Carlo Poma Hospital, 46100 Mantua, Italy;  
10 [massimo.franchini@asst-mantova.it](mailto:massimo.franchini@asst-mantova.it)

11 <sup>3</sup>Department of Anesthesiology & Perioperative Medicine, Mayo Clinic, Rochester, MN 55902,  
12 USA [joyner.michael@mayo.edu](mailto:joyner.michael@mayo.edu); [senefeld.jonathon@mayo.edu](mailto:senefeld.jonathon@mayo.edu)

13 <sup>4</sup>North-Western Tuscany Blood Bank, Pisa University Hospital, 56124 Pisa, Italy.  
14 [daniele.focosi@gmail.com](mailto:daniele.focosi@gmail.com)

15  
16 **Keywords:** convalescent plasma; SARS-CoV-2; COVID-19; BQ.1.1; XBB; BF.7: virus  
17 neutralization.

18 **Abbreviations:** VOC: variant of concern; VaxCCP, plasma from both vaccinated and COVID-  
19 19 convalescent subjects.

20 **Author contributions:** DJS: data extraction, table curation and design, and writing original  
21 draft; D.F.: conceptualization, data access and verification and manuscript revision; M.F. data  
22 access and verification and manuscript revision; JWS data access and verification and  
23 manuscript revision, MJJ and AC manuscript revision.

24 **Data availability statement:** all the data used for this manuscript are available in the  
25 Supplementary Dataset file.

26  
27 **Corresponding author:** David Sullivan, 615 N. Wolfe St Rm W4606, Baltimore MD 21205.  
28 Tel 410 502 2522, fax 410 955 0105. E-mail [dsulliv7@jhmi.edu](mailto:dsulliv7@jhmi.edu)

29  
30 **Word counts :** Abstract 230; Text – 1952.

31 Abstract

32 The SARS-CoV-2 Omicron variants, dominating in the late 2022 COVID-19 waves, have acquired  
33 resistance to most neutralizing anti-Spike monoclonal antibodies authorized so far, and the BQ.1.\*  
34 sublineages, dominant in the western countries, are notably resistant to all authorized monoclonal  
35 antibodies. Polyclonal antibodies from individuals both with at least 3 vaccine doses and also  
36 recently recovered from Omicron COVID-19 (VaxCCP) could retain neutralizing activity against  
37 such new Omicron lineages. Here we reviewed BQ.1.1 virus neutralization data from 740  
38 individual patient samples from 37 separate cohorts defined by boosted vaccinations with or  
39 without recent Omicron COVID-19, as well as infection without vaccination. More than 96% of  
40 the plasma samples from individuals in the recently (within 6 months) boosted VaxCCP study  
41 cohorts neutralized BQ.1.1, XBB.1 and BF.7 with 100% neutralization of WA-1, BA.4/5, BA.4.6  
42 and BA.2.75. The geometric mean of the geometric mean 50% neutralizing titers (GM(GMT<sub>50</sub>)  
43 were 334, 72 and 204 for BQ.1.1, XBB.1 and BF.7, respectively. Compared to VaxCCP, plasma  
44 sampled from COVID-19 naïve subjects who also recently within 6 months received at least a third  
45 vaccine dose had about half of the GM(GMT<sub>50</sub>) for all viral variants with percent neutralizations  
46 of 79%, 52% and 94% for BQ.1.1, XBB.1 and BF.7, respectively. Boosted VaxCCP characterized  
47 by either recent vaccine dose or infection event within 6 months represents a robust, variant-  
48 resilient, passive immunotherapy against the new Omicron BQ.1.1, XBB.1 and BF.7 variants.

49  
50  
51  
52

|    |                                             |    |
|----|---------------------------------------------|----|
| 53 | <a href="#">Table of contents</a>           |    |
| 54 | Introduction.....                           | 4  |
| 55 | Results.....                                | 4  |
| 56 | Discussion.....                             | 6  |
| 57 | Search strategy and selection criteria..... | 7  |
| 58 | References.....                             | 9  |
| 59 | Table 1 .....                               | 11 |
| 60 | Table 2 .....                               | 13 |
| 61 | Figure 1 .....                              | 14 |
| 62 | Figure 2 .....                              | 15 |
| 63 | Figure 3 .....                              | 16 |
| 64 | Supplementary Table 1 .....                 | 17 |
| 65 | Supplementary Table 2 .....                 | 18 |
| 66 | Supplementary Table 3 .....                 | 21 |
| 67 | Supplementary Figure 1 .....                | 23 |
| 68 | Supplementary Figure 2.....                 | 24 |
| 69 | Supplementary Figure 3.....                 | 25 |
| 70 |                                             |    |
| 71 |                                             |    |

## 72 Introduction

73 In immunocompromised (IC) patients both passive immunotherapies and small molecule antivirals  
74 are often necessary to treat COVID-19 or eliminate persistently high SARS-CoV-2 viral load.  
75 Chronic, persistent viral loads increase both transmission and mutation risk, and prevent  
76 administration of the required immunosuppressive/antineoplastic therapies<sup>1</sup>. Small molecule  
77 antivirals have not been formally validated for IC patients, who often have contraindications, and  
78 the convergent evolution of the Omicron variant of concern (VOC) has led to inefficacy of all the  
79 anti-Spike monoclonal antibodies (mAbs) authorized so far for both treatment or prevention, e.g.  
80 in the highly prevalent BQ.1.\* sublineages<sup>2</sup>. The other rapidly growing XBB.\* and BF.7  
81 sublineages are also highly resistant to anti-Spike mAbs<sup>3</sup>. Polyclonal plasma from individuals who  
82 are both vaccinated and had COVID-19 (VaxCCP) has more than ten times the antibody levels  
83 capable of neutralizing pre-Omicron variants as well as Omicron variants BA.1 through BA.4/5<sup>4,5</sup>.  
84 Polyclonal COVID-19 convalescent plasma (CCP) has thousands of distinct antibody specificities  
85 of different isotypes, including many capable of SARS-CoV-2 neutralization. High-titer pre-  
86 Omicron CCP contains Omicron neutralizing activity despite being collected before variant  
87 appearance<sup>4,5</sup>.

88  
89 Given that CCP remains a recommended therapy for IC<sup>1,6,7</sup>, we systematically reviewed recent  
90 primary research for neutralization results against BQ.1.1 by plasma collected from vaccinated  
91 subjects with or without COVID-19 or after recent Omicron infection alone.

92

## 93 Results

94 Eight articles were included (**Figure 1**) which contained virus neutralizations with WA-1, BQ.1.1,  
95 BA.4/5, BA.4.6, XBB.1 and BF.7, assessed with either live authentic SARS-CoV-2 or SARS-  
96 CoV-2 pseudovirus neutralization assays and represented data from 652 patients (**Supplementary**  
97 **Table 1**). Qu *et al.* in the USA reported on Spring and Summer 2022 breakthrough infections with  
98 BA.1 and BA.4/5 in two sampled cohorts with predominantly unvaccinated individuals, as well as  
99 a third cohort of healthcare workers after a single monovalent booster vaccination in the Fall of  
100 2021<sup>8</sup> (**Table 1**). Zou *et al.* in the USA in the Summer and Fall of 2022 sampled individuals who  
101 had already received 3 mRNA BNT162b2 vaccinations with or without previous COVID-19, both  
102 before and about 4 weeks after a 4<sup>th</sup> monovalent or bivalent vaccine booster vaccination<sup>9</sup>. Miller  
103 *et al.* also in the USA sampled both before the 3<sup>rd</sup> vaccination dose and about 4 weeks after  
104 monovalent mRNA vaccination in the Fall of 2021, as well as with the 4<sup>th</sup> vaccine dose in the  
105 Summer or Fall of 2022, with either monovalent or bivalent booster vaccinations in Fall of 2022  
106 in those with no documented COVID-19<sup>10</sup>. Cao *et al.* in China investigated BQ.1.1 neutralizations  
107 from plasma of 4 cohorts after 3 doses of CoronaVac (Fall 2021) without COVID-19 or 2-12 weeks  
108 after BA.1, BA.2 and BA.5 infection<sup>3</sup>. Planas *et al.* in France evaluated GMT<sub>50</sub> in plasma from  
109 individuals both 4 and 16 weeks after a third monovalent mRNA vaccine dose in the Fall of 2021  
110 as well as 12 and 32 weeks after vaccine breakthrough BA.1/2 or BA.5 infection<sup>11</sup>. Davis *et al.* in  
111 the USA sampled after the 3<sup>rd</sup> mRNA vaccine monovalent dose in the Fall of 2021 and also after  
112 either a 4<sup>th</sup> monovalent mRNA dose or a bivalent (wild-type + BA.4/5) vaccine dose in the  
113 Summer and Fall of 2022<sup>12</sup>. Kurhade *et al.* in the USA also compared GMT<sub>50</sub> after the 4<sup>th</sup>  
114 monovalent vaccine dose or 3 mRNA doses with the 4<sup>th</sup> the bivalent dose without COVID-19 and  
115 also after bivalent boost with recent COVID-19<sup>13</sup>. Wang *et al.* in the USA compared GMT<sub>50</sub> after  
116 three vaccine doses, the 4<sup>th</sup> monovalent vaccine dose or 3 mRNA doses with the 4<sup>th</sup> the bivalent

117 dose without COVID-19, and also after 2-3 vaccine doses and recent BA.2 breakthrough infection  
118 or 3-4 mRNA vaccine doses and recent BA.4/5 breakthrough infection<sup>14</sup>.

119  
120 These diverse cohorts were assembled into 3 groups, 1) plasma after both 2-4 vaccine doses and  
121 COVID-19 (VaxCCP); 2) plasma from subjects after administration of 3-4 vaccine doses (i.e.  
122 boosted), but either self-reported as COVID-19-*naïve* or anti-nucleocapsid negative; and 3)  
123 Omicron infection without vaccination (CCP) as well as participants sampled 6 to 11 months after  
124 previous vaccine dose and before the booster vaccination. Boosted VaxCCP neutralized BQ.1.1,  
125 XBB.1 and BF.7 with approximately 3 times the dilutional potency of the vaccine-only or 2-6  
126 times CCP/pre-boost vaccination groups for all viral variants (**Table 2 and Figure 2**). Importantly,  
127 while there was a 20-fold reduction in neutralization by boosted VaxCCP against BQ.1.1 compared  
128 to WA-1, more than 96% of the boosted VaxCCP samples neutralized BQ.1.1 as well as XBB.1  
129 and BF.7 (**Table 2 and Figure 2c**). The single cohort within the boosted VaxCCP group which  
130 was at 85% neutralization was sampled late, 8 months after BA.1/2 breakthrough infection<sup>11</sup>  
131 (**Supplementary Table 2 and 3**). Except for the GMT (GMT<sub>50</sub>) against XBB.1 at 72, the other  
132 viral variant neutralizations were in the same range as pre-Alpha CCP neutralizing WA-1 (i.e.,  
133 311)<sup>4</sup>. By comparison the large randomized clinical trial which effectively reduced outpatient  
134 COVID-19 progression to hospitalizations had a GMT<sub>50</sub> of 80 for WA-1 with pre-Alpha CCP<sup>15</sup>.  
135 Boosted vaccinations at 3-4 doses without COVID-19, showed GM(GMT<sub>50</sub>) of 123 for BQ.1.1,  
136 with only 6 of 21 cohorts over 90% neutralizations, for 82% overall (i.e. 272 of 344 individuals).  
137 Four separate studies<sup>8,13,12,10</sup> characterized BQ.1.1 virus neutralizations with plasma after the new  
138 bivalent (wild-type + BA.4/5) mRNA vaccine booster in the Fall of 2022, with 88% (103 of 117  
139 samples) neutralization activity within 4 weeks of bivalent booster (**Supplementary Table 3**).

140  
141 Many studies performed virus neutralizations on samples drawn before the 3<sup>rd</sup> or 4<sup>th</sup> vaccine dose  
142 which were 6 to 11 months after last vaccine dose. The GM(GMT<sub>50</sub>)'s for BQ.1.1 and BA.2.75  
143 were about 6 times reduced compared to VaxCCP even though the fold reductions were similar  
144 (**Figure 3, Table 2**). In agreement with lower GMT<sub>50</sub> for neutralizations was the low percent  
145 neutralizing BQ.1.1 (60%), XBB.1 (46%), and BF.7 (75%) at 6 to 11 months after vaccination  
146 (**Figure 3, Table 2 and Supplementary Table 3**).

147  
148 Four studies used the lentiviral pseudovirus assays, with diverse Spike proteins cloned in, while  
149 the other four were live virus assays using different cell types (**Supplementary Table 1**). Notably,  
150 Planas *et al* employed the IGROV-1 cell type for better growth of Omicron sublineages<sup>11</sup>. While  
151 the single study fold reductions (FR) and percent neutralizations normalize the results between  
152 studies, the GMT<sub>50</sub> can vary between studies even amongst the live authentic viral neutralization  
153 studies (e.g., mNeonGreen<sup>TM</sup> reporter assays versus cytopathic effects)<sup>9,13</sup>. We sorted the live  
154 authentic viral neutralizations from the pseudoviral neutralizations, plotting also the minimum and  
155 maximums (**Supplementary Figures 1-3**). In general, the live authentic SARS-CoV-2  
156 neutralization assays for VaxCCP appeared to have similar antibody neutralization levels, with the  
157 single study by Cao *et al*<sup>3</sup> employing lentiviral pseudovirus with lower dilutional titers. In contrast,  
158 the GMT<sub>50</sub> achieved with pseudoviral assays in the boosted vaccinations without COVID-19  
159 appeared slightly higher than the ones achieved with authentic virus.

160

161 **Discussion**

162 The FDA deemed CCP safe and effective for both immunocompetent and IC COVID-19  
163 outpatients<sup>6,7,16</sup>, and further extended its authorized use in the IC patient population in December  
164 2021<sup>7,16</sup>, at a time when oral antiviral therapy promised a no transfusion outpatient solution and  
165 many anti-Spike mAbs were still effective.

166  
167 Up until the present, CCP remained a backup bridge for IC patients, durable against the changing  
168 variants and as a salvage therapy in seronegative IC patients. With the recent advent of Omicron  
169 XBB.\* and BQ.1.\* defeating the remaining anti-Spike mAbs, boosted VaxCCP, recently collected  
170 within the last 6 months of either a vaccine dose or SARS-CoV-2 is likely to be the only viable  
171 remaining passive antibody therapy in the 2022-23 Winter for IC patients who have failed to make  
172 antibodies after vaccination and still require B-cell depleting drugs or immunosuppressive  
173 therapy. In a literature review of CCP from diverse VOC waves as well as boosted vaccinees and  
174 VaxCCP up to BA-1, VaxCCP showed higher neutralization titers against Omicron at levels above  
175 300 dilutional GMT<sub>50</sub><sup>4</sup>.

176  
177 The accelerated evolution of SARS-CoV-2 VOCs has created the problem that the pharmaceutical  
178 development of additional mAbs is not worth the effort and cost given their expected short useful  
179 clinical life expectancy, so the anti-Spike mAb pipeline has remained stuck in 2022. High levels  
180 of antibodies in donor plasma from both boosted vaccinations and COVID-19 convalescent plasma  
181 (VaxCCP) neutralize more than 95% of BQ.1.1 and BF.7 with XBB.1 at 85%. Recently collected  
182 plasma within a 6 month window from those boosted vaccinees without prior documented COVID-  
183 19 had a 20-30% reduction in neutralization percent for BQ.1.1 and XBB.1 with 10% reduction for  
184 the others and a third of the GM(GMT<sub>50</sub>) neutralizing antibody levels compared to VaxCCP. In  
185 those vaccinated with last dose more than 6 months prior to sample collection both the  
186 neutralization percent and neutralizing antibody titers fell further compared to the recently boosted  
187 VaxCCP group. Four studies (Planas<sup>11</sup>, Zou<sup>9</sup>, Cao<sup>3</sup> and Kurhade<sup>13</sup>) had directly comparative  
188 cohorts in the three groups which increases the robustness reduction in neutralizations with the  
189 vaccine only or more than 6 months to last vaccine or infection event compared to VaxCCP. The  
190 main limitation of our systematic review is the small number of studies reporting virus  
191 neutralization with BQ.1.1 with most available as pre-preprints without peer-review yet. However,  
192 we note that peer-review itself does not change GMT<sub>50</sub> or neutralization numbers and the authors  
193 of these papers have considerable expertise in the topic.

194  
195 Boosted VaxCCP has full potential to replace anti-Spike mAbs for passive antibody therapy of IC  
196 patients against recent Omicron sublineages, in the meanwhile polyclonal IgG formulations can  
197 be manufactured. VaxCCP qualification in the real-world will likely remain constrained on high-  
198 throughput serology, whose correlation with GMT<sub>50</sub> is not perfect<sup>17,18</sup>. Nevertheless, the very high  
199 prevalence (96%) of Omicron-neutralizing antibodies and the high GM(GMT<sub>50</sub>) in recently  
200 boosted VaxCCP reassure about its potency, and further confirm that exact donor-recipient VOC  
201 matching is dispensable. Overall, our findings urge WHO to revise its guidelines and recommend  
202 boosted VaxCCP for therapy of COVID-19 in IC patients.

203  
204



## 205 Search strategy and selection criteria

206 On November 19, 2022 we initially searched PubMed, medRxiv and bioRxiv for manuscripts  
207 reporting BQ.1.1 neutralization, using English language as a restriction. Search of bioRxiv with  
208 same keywords yielded 15 records of which only 8 contained plasma viral neutralization data.  
209 Search of medRxiv produced 3 records which did not have BQ.1.1 neutralizations. PubMed  
210 retrieved 3 entries using (“BQ.1.1”) and (“neutralization”), one of which was focused on anti-  
211 Spike mAb alone<sup>2</sup> and the other 2 were duplicates from bioRxiv<sup>8,12</sup>. Articles underwent evaluation  
212 for data extraction by two assessors (DS and DF) with disagreements resolved by third assessor  
213 (AC). Articles lacking plasma BQ.1.1 virus neutralizations were excluded. The process of study  
214 selection is represented in the PRISMA flow diagram (**Figure 1**).

215  
216 The type of viral assay (live or pseudovirus), time interval to blood sample, GMT<sub>50</sub>, minimum and  
217 maximum neutralizing 50% dilutional titer for WA-1 (pre-Alpha wild-type) and Omicron  
218 sublineages BQ.1.1, BA.4/5, BA.4.6, BA.2.75, XBB.1 and BF.7 and number out of total that  
219 neutralized Omicron were abstracted from study text, graphs and tables. Two studies (Wang<sup>14</sup> and  
220 Qu<sup>8</sup>) reported BQ.1 and those were separate cohorts in addition to BQ.1.1. Prism v. 9.4 (GraphPad  
221 Software, San Diego, CA, USA) was used for data analysis. While all manuscripts included  
222 neutralization data against WA-1, BQ.1.1, BA.4/5 and BA.2.75, only a subset of manuscripts  
223 included neutralization data for BA.4.6, XBB.1 and BF.7 which were assembled for relevance to  
224 present circulating variants. Historic early Omicron partial neutralization data on variants like  
225 BA.1 or BA.2 were excluded because of the full set data with BA.4/5 and BA.2.75.

226  
227 Statistical significance between log<sub>10</sub> transformed GMT<sub>50</sub> was investigated using Tukey’s test. The  
228 multiple comparison test was a two-way ANOVA with Alpha 0.05 on log transformed GMT<sub>50</sub>.  
229 The log normal test was performed on WA-1, BQ.1.1, BA.4/5, BA.4.6, XBB.1 and BF.7 virus  
230 GMT<sub>50</sub>. Two studies<sup>10,11</sup> reported the median titer rather than the GMT<sub>50</sub>. Compiled data abstracted  
231 from the published studies is available in the supplementary dataset.

## 232 233 Funding

234 This study was supported by the U.S. Department of Defense’s Joint Program Executive Office  
235 for Chemical, Biological, Radiological and Nuclear Defense (JPEO-CBRND), in collaboration  
236 with the Defense Health Agency (DHA) (contract number: W911QY2090012) (DS), with  
237 additional support from Bloomberg Philanthropies, State of Maryland, the National Institutes of  
238 Health (NIH) National Institute of Allergy and Infectious Diseases 3R01AI152078-01S1 (DS,  
239 AC), NIH National Center for Advancing Translational Sciences U24TR001609-S3 and  
240 UL1TR003098.

## 241 242 Role of the funding source

243 The study sponsors did not contribute to the study design; the collection, analysis, and  
244 interpretation of data; manuscript preparation, and the decision to submit the paper for publication.

## 245 246 Conflict of interest disclosure

247 DJS reports AliquantumRx Founder and Board member with stock options (macrolide for  
248 malaria), Hemex Health malaria diagnostics consulting and royalties for malaria diagnostic test  
249 control standards to Alere- all outside of submitted work. AC reports being part of the scientific

250 advisory board of SabTherapeutics and has received personal fees from Ortho Diagnostics,  
251 outside of the submitted work. All other authors report no relevant disclosures.  
252  
253



254

255 **References**

- 256 1 Senefeld, J. W. *et al.* COVID-19 convalescent plasma for the treatment of  
257 immunocompromised patients: a systematic review. *medRxiv*, 2022.2008.2003.22278359,  
258 doi:10.1101/2022.08.03.22278359 (2022).
- 259 2 Arora, P. *et al.* Omicron sublineage BQ.1.1 resistance to monoclonal antibodies. *Lancet*  
260 *Infect Dis*, doi:10.1016/S1473-3099(22)00733-2 (2022).
- 261 3 Cao, Y. *et al.* Imprinted SARS-CoV-2 humoral immunity induces convergent Omicron  
262 RBD evolution. *bioRxiv*, 2022.2009.2015.507787, doi:10.1101/2022.09.15.507787  
263 (2022).
- 264 4 Sullivan, D. J., Franchini, M., Joyner, M. J., Casadevall, A. & Focosi, D. Analysis of  
265 anti-SARS-CoV-2 Omicron-neutralizing antibody titers in different vaccinated and  
266 unvaccinated convalescent plasma sources. *Nature Communications* **13**, 6478,  
267 doi:10.1038/s41467-022-33864-y (2022).
- 268 5 Li, M. *et al.* Convalescent plasma with a high level of virus-specific antibody effectively  
269 neutralizes SARS-CoV-2 variants of concern. *Blood Adv*, 2022.2003.2001.22271662,  
270 doi:10.1182/bloodadvances.2022007410 (2022).
- 271 6 Hinton, D. M. Vol. <https://www.fda.gov/media/141477/download> (ed FDA) (FDA,  
272 FDA in brief (<https://www.fda.gov/media/141477/download>), 2021).
- 273 7 O'Shaughnessy, J. A. Vol. <https://www.fda.gov/media/141477/download> (FDA website  
274 (<https://www.fda.gov/media/141477/download>), 2021).
- 275 8 Qu, P. *et al.* Distinct Neutralizing Antibody Escape of SARS-CoV-2 Omicron  
276 Subvariants BQ.1, BQ.1.1, BA.4.6, BF.7 and BA.2.75.2. *bioRxiv*,  
277 2022.2010.2019.512891, doi:10.1101/2022.10.19.512891 (2022).
- 278 9 Zou, J. *et al.* Improved Neutralization of Omicron BA.4/5, BA.4.6, BA.2.75.2, BQ.1.1,  
279 and XBB.1 with Bivalent BA.4/5 Vaccine. *bioRxiv*, 2022.2011.2017.516898,  
280 doi:10.1101/2022.11.17.516898 (2022).
- 281 10 Miller, J. *et al.* Substantial Neutralization Escape by the SARS-CoV-2 Omicron Variant  
282 BQ.1.1. *bioRxiv*, 2022.2011.2001.514722, doi:10.1101/2022.11.01.514722 (2022).
- 283 11 Planas, D. *et al.* Resistance of Omicron subvariants BA.2.75.2, BA.4.6 and BQ.1.1 to  
284 neutralizing antibodies. *bioRxiv*, 2022.2011.2017.516888,  
285 doi:10.1101/2022.11.17.516888 (2022).
- 286 12 Davis-Gardner, M. E. *et al.* mRNA bivalent booster enhances neutralization against  
287 BA.2.75.2 and BQ.1.1. *bioRxiv*, 2022.2010.2031.514636,  
288 doi:10.1101/2022.10.31.514636 (2022).
- 289 13 Kurhade, C. *et al.* Low neutralization of SARS-CoV-2 Omicron BA.2.75.2, BQ.1.1, and  
290 XBB.1 by 4 doses of parental mRNA vaccine or a BA.5-bivalent booster. *bioRxiv*,  
291 2022.2010.2031.514580, doi:10.1101/2022.10.31.514580 (2022).
- 292 14 Wang, Q. *et al.* Alarming antibody evasion properties of rising SARS-CoV-2 BQ and  
293 XBB.1 subvariants. *bioRxiv*, 2022.2011.2023.517532, doi:10.1101/2022.11.23.517532  
294 (2022).
- 295 15 Sullivan, D. J. *et al.* Early Outpatient Treatment for Covid-19 with Convalescent Plasma.  
296 *N Engl J Med*, doi:10.1056/NEJMoa2119657 (2022).
- 297 16 Villa, C. (ed OBRR) (FDA (<https://www.fda.gov/media/155159/download>), 2021).

- 298 17 Stone, M. *et al.* Evaluation of Commercially Available High-Throughput SARS-CoV-2  
299 Serologic Assays for Serosurveillance and Related Applications. *Emerg Infect Dis* **28**,  
300 672-683, doi:10.3201/eid2803.211885 (2022).
- 301 18 Patel, E. U. *et al.* Comparative Performance of Five Commercially Available Serologic  
302 Assays To Detect Antibodies to SARS-CoV-2 and Identify Individuals with High  
303 Neutralizing Titers. *J Clin Microbiol* **59**, doi:10.1128/JCM.02257-20 (2021).  
304

305 **Table 1**

306 Synopsis of included studies, reporting plasma sources, epoch of sampling, region, time since  
 307 vaccination/infection to plasma sampling, and sample size. The cohorts were split into three  
 308 groups-1) boosted vaccinations and recent COVID-19 (VaxCCP), 2) boosted vaccines only  
 309 without documented COVID-19 (Vac only) and 3) infection alone or pre-boosted sampling  
 310 before 3<sup>rd</sup> or 4<sup>th</sup> vaccine dose (Infection only or pre-boost)

| Study                 | Vaccine and COVID-19 history at sample time | Group    | Time period of plasma sampling | Geography | Sampling time mean or median (min-max)              | Sample number |
|-----------------------|---------------------------------------------|----------|--------------------------------|-----------|-----------------------------------------------------|---------------|
| Cao <sup>3</sup>      | 3xCorVac+BA.1 inf                           | VaxCCP   | Spring 2022                    | China     | 5-7 weeks post hosp admit (42 weeks avg)            | 50            |
| Cao <sup>3</sup>      | 3xCorVac +BA.2 inf                          | VaxCCP   | Summer 2022                    | China     | 3-11 weeks post hosp admit (8 weeks mean)           | 39            |
| Cao <sup>3</sup>      | 3xCorVac +BA.5 inf                          | VaxCCP   | Summer/Fall 2022               | China     | 2-11 weeks (mean 5 weeks)                           | 36            |
| Zou <sup>9</sup>      | 4xBNT162b2+BTI                              | VaxCCP   | Summer/Fall 2022               | USA       | 4 week post dose                                    | 20            |
| Planas <sup>11</sup>  | mRNAvacx3+ BA.1/2 inf                       | VaxCCP   | Spring/Fall 2022               | France    | 32 weeks post BTI BA.1/2                            | 13            |
| Wang <sup>14</sup>    | 2-3xmRNAvac+ BA.2 BTI                       | VaxCCP   | Spring/Fall 2022               | USA       | 2-23 weeks (mean 6 wk (3over 90 days))              | 14            |
| Wang <sup>14</sup>    | 3-4xmRNAvac+ BA.4/5 BTI                     | VaxCCP   | Summer/Fall 2022               | USA       | 2-8 weeks (mean 4 weeks)                            | 20            |
| Kurhade <sup>13</sup> | 3xmRNAvac+bivalent+BTI                      | VaxCCP   | Fall 2022                      | USA       | 4 weeks post with infection history                 | 23            |
| Zou <sup>9</sup>      | 3xBNT162b2+bivalent+BTI                     | VaxCCP   | Summer/Fall 2022               | USA       | 4 week post dose                                    | 19            |
| Planas <sup>11</sup>  | 3xmRNAvac+ BA.1/2 inf                       | VaxCCP   | Spring/Fall 2022               | France    | 12 weeks post BTI BA.1/2                            | 16            |
| Planas <sup>11</sup>  | 3xmRNAvac+ BA.5 inf                         | VaxCCP   | Fall 2022                      | France    | 8 weeks post BTI BA.5                               | 15            |
| Davis <sup>12</sup>   | 3xmRNAvac                                   | Vac only | Fall 2021                      | USA       | 1-4 weeks post boost                                | 12            |
| Kurhade <sup>13</sup> | 4xmRNAvac                                   | Vac only | Summer 2022                    | USA       | 4-12 weeks                                          | 25            |
| Cao <sup>3</sup>      | 3xCorVac                                    | Vac only | Fall 2021                      | China     | 4 weeks                                             | 40            |
| Zou <sup>9</sup>      | 4xBNT162b2                                  | Vac only | Summer/Fall 2022               | USA       | 4 weeks post dose                                   | 20            |
| Planas <sup>11</sup>  | 3xmRNAvac                                   | Vac only | Winter 2021/2022               | France    | 16 weeks post 3rd dose                              | 10            |
| Wang <sup>14</sup>    | 3xmRNAvac                                   | Vac only | Fall 2021                      | USA       | 2-12 weeks (mean 5 weeks)                           | 14            |
| Wang <sup>14</sup>    | 3xmRNAvac+monovalent                        | Vac only | Summer/Fall 2022               | USA       | 3-4 weeks                                           | 19            |
| Wang <sup>14</sup>    | 3xmRNAvac+bivalent                          | Vac only | Summer/Fall 2022               | USA       | 3-4 weeks                                           | 21            |
| Davis <sup>12</sup>   | 3xmRNAvac+monovalent                        | Vac only | Summer/Fall 2022               | USA       | 10-15 weeks post boost                              | 12            |
| Kurhade <sup>13</sup> | 3xmRNAvac+bivalent                          | Vac only | Fall 2022                      | USA       | 4 weeks post                                        | 29            |
| Davis <sup>12</sup>   | 3xmRNAvac+bivalent                          | Vac only | Summer/Fall 2022               | USA       | 2-6 weeks post booster (8 no vacc. 10 no infection) | 12            |
| Qu <sup>8</sup>       | 3xmRNAvac                                   | Vac only | Fall 2021                      | USA       | 2-13 weeks                                          | 15            |
| Zou <sup>9</sup>      | 3xBNT162b2+bivalent                         | Vac only | Summer/Fall 2022               | USA       | 4 week post dose                                    | 18            |
| Planas <sup>11</sup>  | 3xmRNAvac                                   | Vac only | Fall/Winter 2021               | France    | 4 weeks post 3rd dose                               | 18            |
| Miller <sup>10</sup>  | 3xBNT162b2                                  | Vac only | Fall 2021                      | USA       | 2-4 weeks                                           | 16            |

|                      |                                 |                          |                  |     |                                                       |    |
|----------------------|---------------------------------|--------------------------|------------------|-----|-------------------------------------------------------|----|
| Miller <sup>10</sup> | 3xmRNA+ monovalent              | Vac only                 | Spring/Fall 2022 | USA | 2-9 weeks                                             | 18 |
| Miller <sup>10</sup> | 3xmRNA +bivalent                | Vac only                 | Fall 2022        | USA | 2-3 weeks                                             | 15 |
| Qu <sup>8</sup>      | BA.4/5 inf (17-unvac)           | Inf only                 | Summer 2022      | USA | not stated                                            | 20 |
| Qu <sup>8</sup>      | Hosp BA.1 (6-unvac;5-2xmRNAvac) | Inf only                 | Spring 2022      | USA | 1 week post hospitalization                           | 15 |
| Zou <sup>9</sup>     | 3xBNT162b2+BTI                  | preboost with BNT162b    | Summer/Fall 2022 | USA | preboost with BNT162b (6-11 months post last dose)    | 20 |
| Zou <sup>9</sup>     | 3xBNT162b2 +BTI                 | preboost with bivalent   | Summer/Fall 2022 | USA | preboost with bivalent (6-11 months post last dose)   | 19 |
| Zou <sup>9</sup>     | 3xBNT162b2                      | preboost with bivalent   | Summer/Fall 2022 | USA | preboost with bivalent (6-11 months post last dose)   | 18 |
| Zou <sup>9</sup>     | 3xBNT162b2                      | preboost with BNT162b    | Summer/Fall 2022 | USA | preboost with BNT162b (6-11 months post last dose)    | 20 |
| Miller <sup>10</sup> | 2xBNT162b2                      | preboost with BNT162b    | Fall 2021        | USA | preboost (6-11 months post last dose)                 | 16 |
| Miller <sup>10</sup> | 3xmRNA                          | preboost with bivalent   | Fall 2022        | USA | preboost with bivalent (6-11 months post last dose)   | 15 |
| Miller <sup>10</sup> | 3xmRNA                          | preboost with monovalent | Spring/Fall 2022 | USA | preboost with monovalent (6-11 months post last dose) | 18 |

311

312 **Table 2**

313 GM(GMT<sub>50</sub>) of plasma from three different sources against recent Omicron sublineages.

| <b>Neutralization virus</b>                                 | <b>WA-1</b> | <b>BQ.1.1</b> | <b>BA.4/5</b> | <b>BA.4.6</b> | <b>BA.2.75</b> | <b>XBB.1</b> | <b>BF.7</b> |
|-------------------------------------------------------------|-------------|---------------|---------------|---------------|----------------|--------------|-------------|
| <b>Post COVID-19/vaccine (study cohorts)</b>                | 11          | 13            | 11            | 6             | 9              | 8            | 4           |
| GM(GMT <sub>50</sub> )                                      | 6561*       | 334           | 1005          | 352           | 303            | 72           | 204         |
| Fold reduction from WA-1                                    | ref         | 20            | 7             | 19            | 22             | 91           | 32          |
| Samples tested                                              | 265         | 265           | 265           | 106           | 231            | 96           | 148         |
| Samples neutralizing                                        | 265         | 167**         | 264           | 106**         | 230            | 82           | 146         |
| Percent neutralizing                                        | 100         | 96            | 100           | 100           | 100            | 85           | 99          |
| <b>Boosted vaccine (study cohorts)</b>                      | 17          | 21            | 17            | 7             | 14             | 7            | 7           |
| GM(GMT <sub>50</sub> )                                      | 4350        | 123           | 362           | 123           | 107            | 47           | 357         |
| Fold reduction from WA-1                                    | ref         | 35            | 12            | 35            | 41             | 93           | 12          |
| Samples tested                                              | 314         | 344           | 314           | 136           | 261            | 147          | 158         |
| Samples neutralizing                                        | 314         | 272           | 295           | 126           | 231            | 76           | 149         |
| Percent neutralizing                                        | 100         | 79            | 94            | 93            | 89             | 52           | 94          |
| <b>Infection only or preboosted vaccine (study cohorts)</b> | 9           | 11            | 9             | 6             | 9              | 4            | 5           |
| GM(GMT <sub>50</sub> )                                      | 1022        | 48            | 101           | 117           | 57             | 22           | 110         |
| Fold reduction from WA-1                                    | ref         | 21            | 10            | 9             | 18             | 47           | 9           |
| Samples tested                                              | 161         | 197           | 161           | 113           | 162            | 78           | 84          |
| Samples neutralizing                                        | 159         | 123           | 123           | 85            | 104            | 36           | 63          |
| Percent neutralizing                                        | 99          | 62            | 76            | 75            | 64             | 46           | 75          |

314 \*Pre-Alpha CCP from 27 different studies had a GM(GMT<sub>50</sub>) of 311 from 707 samples with 315  
315 or 45% neutralizing omicron BA.1<sup>4</sup>.

316 \*\* percent neutralizations after CoronaVac and Omicron COVID-19 in the paper by Cao *et al*  
317 could not be retrieved from the manuscript. 174 samples from the 6 other cohorts were used for  
318 percent neutralization.

319

320

321 **Figure 1**  
322 PRISMA flowchart for the current study. Number of records identified from various sources,  
323 excluded by manual screening, found eligible and included according to subgroup analyses.  
324  
325

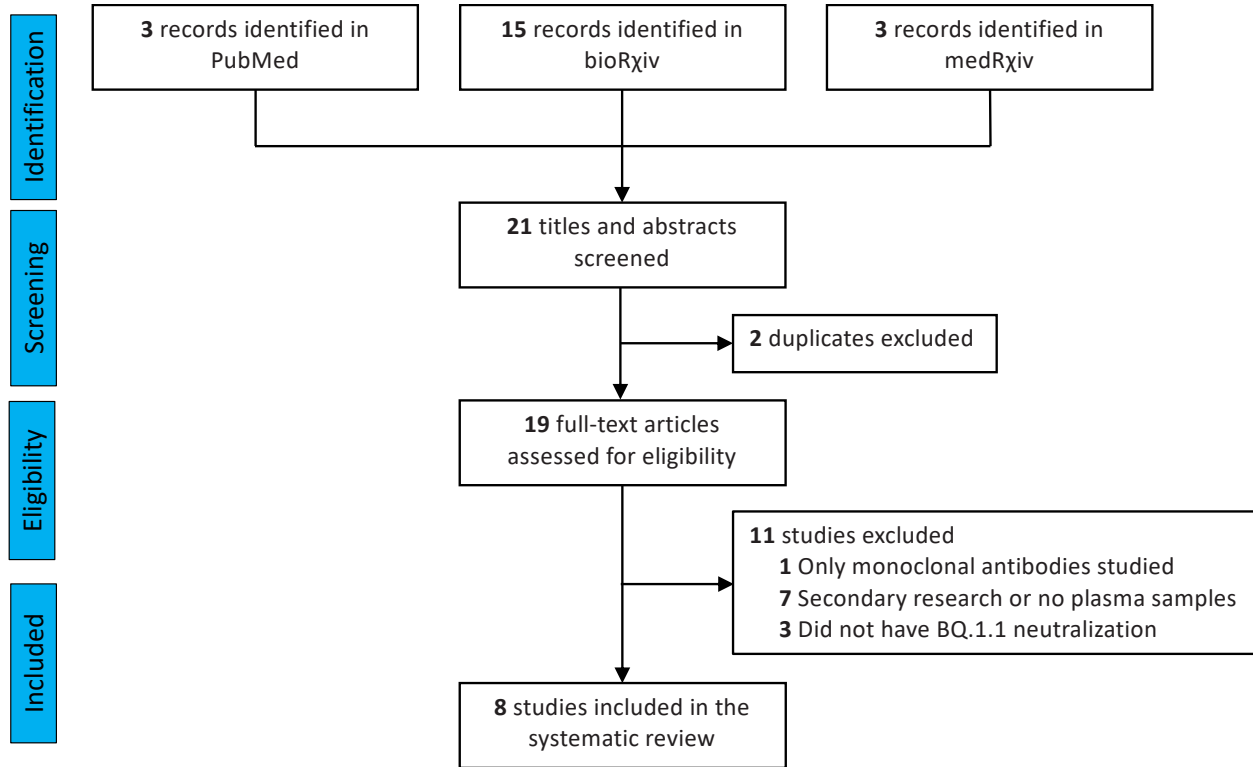

326





336 **Figure 3**

337 Geometric mean neutralizing titers (GMT<sub>50</sub>) against WA-1, BQ.1.1, BA.4/5, BA.4.6, BA.2.75, XBB, BF.7  
 338 A) plasma Omicron infection alone or pre-boasted-6 to 11 months after last vaccine dose sampled in 2021  
 339 or 2022. Geometric standard deviation for error bars, fold reduction (FR) above data, and number of studies  
 340 above x-axis. GM(GMT<sub>50</sub>) statistically significant in difference by multiple comparison in Tukey's test are  
 341 indicated. B). The percent of total samples within a study which neutralized Omicron BQ.1.1 graphed in  
 342 increasing percentages on left y-axis with the total number of samples tested on the right y-axis.

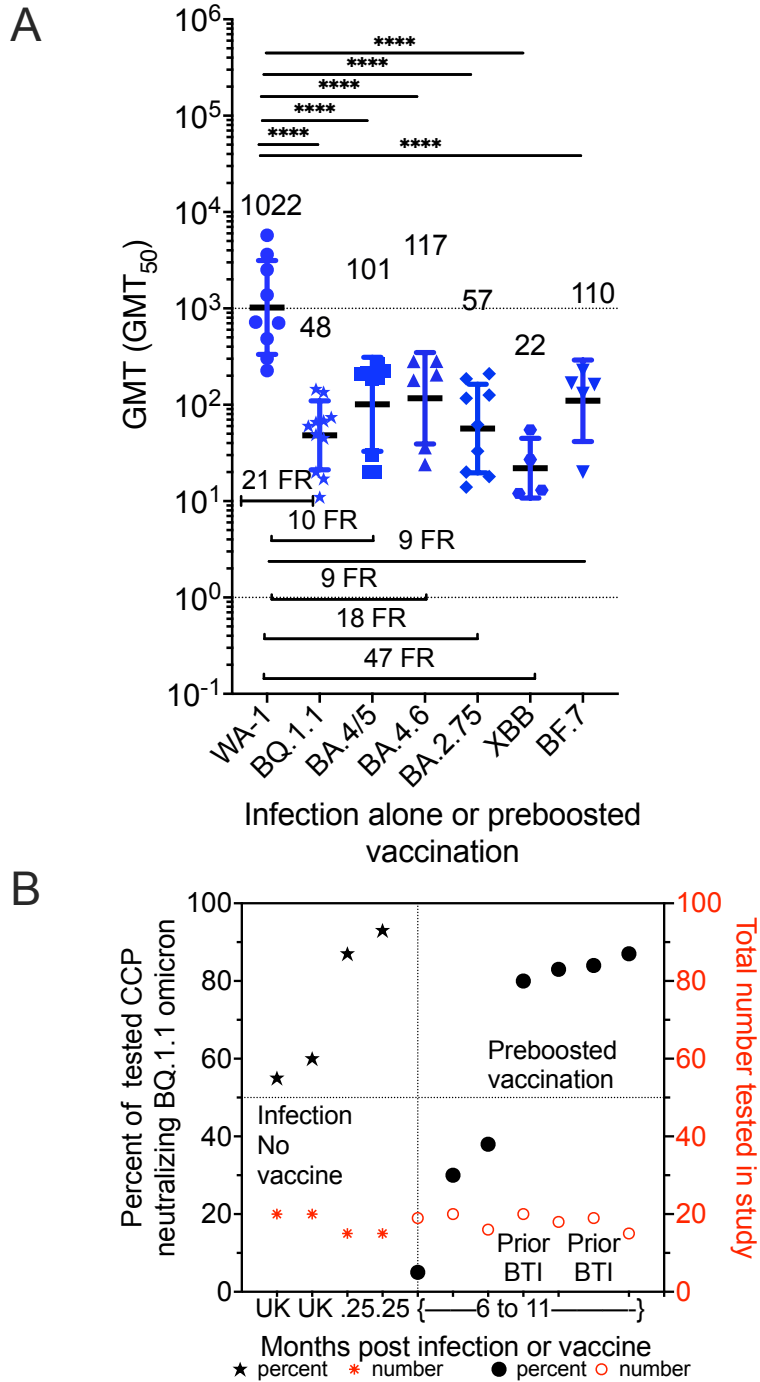

343

344

345 **Supplementary Table 1**

346 Virus neutralization assays.

| Reference             | Assay       | Virus                                       | Replication-competent cells | neutralization threshold |
|-----------------------|-------------|---------------------------------------------|-----------------------------|--------------------------|
| Qu <sup>8</sup>       | Pseudovirus | Lentiviral pseudovirus                      | HEK293T-ACE-2               | 80                       |
| Miller <sup>10</sup>  | Pseudovirus | Lentiviral pseudovirus                      | HEK293T-ACE-2               | 20                       |
| Cao <sup>3</sup>      | Pseudovirus | VSV pseudovirus                             | HEK293T-ACE-2               | 20                       |
| Wang <sup>14</sup>    | Pseudovirus | VSV pseudovirus                             | VeroE6-                     | 100                      |
| Davis <sup>12</sup>   | Live virus  | Live authentic SARS-CoV-2                   | VeroE6-TMPRSS2              | 20                       |
| Kurhade <sup>13</sup> | Live virus  | mNeonGreen reporter USA-WA1/2020 SARS-CoV-2 | Vero E6-TMPRSS2             | 20                       |
| Planas <sup>11</sup>  | Live virus  | Live authentic SARS-CoV-2                   | IGROV-1 or Vero E6-TMPRSS2  | 30                       |
| Zou <sup>9</sup>      | Live virus  | mNeonGreen reporter USA-WA1/2020 SARS-CoV-2 | Vero E6-TMPRSS2             | 20                       |

347

348

349

350 Supplementary Table 2

351 GMT<sub>50</sub> of different plasma sources against BQ.1.1, BA.4/5, BA.4.6, BA.2.75, XBB.1 and BF.7 and fold-reductions (FR) compared to  
 352 WA-1.

| papers                | Vaccine and COVID-19 history at sample time | Group    | #  | WA-1 GMT <sub>50</sub> | BQ.1.1 GMT <sub>50</sub> | FR BQ.1.1 | BA.4/5 GMT <sub>50</sub> | FR BA.4/5 | BA.4.6 GMT <sub>50</sub> | FR BA.4.6 | BA.2.75 GMT <sub>50</sub> | FR BA.2.75 | XBB.1 GMT <sub>50</sub> | FR XB B | BF.7 GMT <sub>50</sub> | FR BF.7 |
|-----------------------|---------------------------------------------|----------|----|------------------------|--------------------------|-----------|--------------------------|-----------|--------------------------|-----------|---------------------------|------------|-------------------------|---------|------------------------|---------|
| Cao <sup>3</sup>      | 3xCorVac+BA.1 BTI                           | VaxCCP   | 50 | 1557                   | 27                       | 58        | 107                      | 15        | 23                       | 68        | 197                       | 8          | 23                      | 68      | 70                     | 22      |
| Cao <sup>3</sup>      | 3xCorVac +BA.2 BTI                          | VaxCCP   | 39 | 1245                   | 40                       | 31        | 175                      | 7         | 22                       | 57        | 217                       | 6          | 23                      | 54      | 97                     | 13      |
| Cao <sup>3</sup>      | 3xCorVac +BA.5 BTI                          | VaxCCP   | 36 | 1136                   | 77                       | 15        | 508                      | 2         | 27                       | 42        | 145                       | 8          | 27                      | 42      | 208                    | 5       |
| Zou <sup>9</sup>      | 4xBNT162b2+BTI                              | VaxCCP   | 20 | 5120                   | 132                      | 39        | 629                      | 8         | 587                      | 9         | 265                       | 19         | 99                      | 52      |                        |         |
| Planas <sup>11</sup>  | 3xmRNAvac+ BA.1/2 BTI                       | VaxCCP   | 13 | 8000                   | 200                      | 40        | 400                      | 20        | 500                      | 16        | 200                       | 40         |                         |         |                        |         |
| Wang <sup>14</sup>    | 2-3xmRNAvac+ BA.2 BTI                       | VaxCCP   | 14 | 24970                  | 849                      | 29        | 3727                     | 7         |                          |           |                           |            | 186                     | 134     |                        |         |
| Wang <sup>14</sup>    | 2-3xmRNAvac+ BA.2 BTI--BQ.1                 | VaxCCP   | 14 |                        | 1250                     | 20        |                          |           |                          |           |                           |            |                         |         |                        |         |
| Wang <sup>14</sup>    | 3-4xmRNAvac+ BA.4/5 BTI                     | VaxCCP   | 20 | 20507                  | 671                      | 31        | 5541                     | 4         |                          |           |                           |            | 214                     | 96      |                        |         |
| Wang <sup>14</sup>    | 3-4xmRNAvac+ BA.4/5 BTI--BQ.1               | VaxCCP   | 20 |                        | 1644                     | 12        |                          |           |                          |           |                           |            |                         |         |                        |         |
| Kurhade <sup>13</sup> | 3xmRNAvac+bivalent+BTI                      | VaxCCP   | 23 | 5776                   | 267                      | 22        | 1558                     | 4         | 744                      | 8         | 367                       | 16         | 103                     | 56      | 1223                   | 5       |
| Zou <sup>9</sup>      | 3xBNT162b2+bivalent+BTI                     | VaxCCP   | 19 | 4847                   | 444                      | 11        | 1377                     | 4         | 1564                     | 3         | 326                       | 15         | 131                     | 37      |                        |         |
| Planas <sup>11</sup>  | 3xmRNAvac+ BA.1/2 BTI                       | VaxCCP   | 16 | 25000                  | 700                      | 36        | 1000                     | 25        | 2000                     | 13        | 600                       | 42         |                         |         |                        |         |
| Planas <sup>11</sup>  | 3xmRNAvac+ BA.5 BTI                         | VaxCCP   | 15 | 30000                  | 3000                     | 10        | 10000                    | 3         | 9000                     | 3         | 900                       | 33         |                         |         |                        |         |
| Davis <sup>12</sup>   | 3xmRNAvac                                   | Vac only | 12 | 758                    | 19                       | 40        | 50                       | 15        |                          |           | 23                        | 33         |                         |         |                        |         |
| Kurhade <sup>13</sup> | 4xmRNAvac                                   | Vac only | 25 | 1533                   | 22                       | 70        | 95                       | 16        | 62                       | 25        | 26                        | 59         | 15                      | 102     | 69                     | 22      |
| Cao <sup>3</sup>      | 3xCorVac                                    | Vac only | 40 | 652                    | 24                       | 27        | 72                       | 9         | 21                       | 31        | 90                        | 7          | 20                      | 33      | 45                     | 14      |
| Zou <sup>9</sup>      | 4xBNT162b2                                  | Vac only | 20 | 1325                   | 26                       | 51        | 89                       | 15        | 92                       | 14        | 37                        | 36         | 17                      | 78      |                        |         |
| Planas <sup>11</sup>  | 3xmRNAvac                                   | Vac only | 10 | 1500                   | 40                       | 38        | 60                       | 25        | 60                       | 25        | 10                        | 150        |                         |         |                        |         |
| Wang <sup>14</sup>    | 3xmRNAvac                                   | Vac only | 14 | 7687                   | 139                      | 55        | 628                      | 12        |                          |           |                           |            | 108                     | 71      |                        |         |
| Wang <sup>14</sup>    | 3xmRNAvac--BQ.1                             | Vac only | 14 |                        | 208                      | 37        |                          |           |                          |           |                           |            |                         |         |                        |         |
| Wang <sup>14</sup>    | 3xmRNAvac+monovalent                        | Vac only | 19 | 21182                  | 261                      | 81        | 1540                     | 14        |                          |           |                           |            | 137                     | 155     |                        |         |
| Wang <sup>14</sup>    | 3xmRNAvac+monovalent--BQ.1                  | Vac only | 19 |                        | 496                      | 43        |                          |           |                          |           |                           |            |                         |         |                        |         |

|                       |                                       |                        |    |       |     |     |      |    |     |    |     |     |     |     |      |    |
|-----------------------|---------------------------------------|------------------------|----|-------|-----|-----|------|----|-----|----|-----|-----|-----|-----|------|----|
| Wang <sup>14</sup>    | 3xmRNAvac+bivalent                    | Vac only               | 21 | 13736 | 337 | 41  | 1688 | 8  |     |    |     |     | 162 | 85  |      |    |
| Wang <sup>14</sup>    | 3xmRNAvac+bivalent--BQ.1              | Vac only               | 21 |       | 568 | 24  |      |    |     |    |     |     |     |     |      |    |
| Davis <sup>12</sup>   | 3xmRNAvac+monovalent                  | Vac only               | 12 | 1812  | 53  | 34  | 142  | 13 |     |    | 65  | 28  |     |     |      |    |
| Kurhade <sup>13</sup> | 3xmRNAvac+bivalent                    | Vac only               | 29 | 3620  | 73  | 50  | 298  | 12 | 183 | 20 | 98  | 37  | 35  | 103 | 305  | 12 |
| Davis <sup>12</sup>   | 3xmRNAvac+bivalent                    | Vac only               | 12 | 2312  | 112 | 21  | 576  | 4  |     |    | 201 | 12  |     |     |      |    |
| Qu <sup>8</sup>       | 3xmRNAvac--BQ.1                       | Vac only               | 15 |       | 140 | 19  |      |    |     |    |     |     |     |     |      |    |
| Qu <sup>8</sup>       | 3xmRNAvac                             | Vac only               | 15 | 2616  | 114 | 23  | 300  | 9  | 246 | 11 | 589 | 4   |     |     | 238  | 11 |
| Zou <sup>9</sup>      | 3xBNT162b2+bivalent                   | Vac only               | 18 | 2237  | 143 | 16  | 518  | 4  | 524 | 4  | 117 | 19  | 55  | 41  |      |    |
| Planas <sup>11</sup>  | 3xmRNAvac                             | Vac only               | 18 | 6000  | 200 | 30  | 300  | 20 | 300 | 20 | 60  | 100 |     |     |      |    |
| Miller <sup>10</sup>  | 3xBNT162b2                            | Vac only               | 16 | 45695 | 261 | 175 | 887  | 52 |     |    | 387 | 118 |     |     | 595  | 77 |
| Miller <sup>10</sup>  | 3xmRNA+monovalent                     | Vac only               | 18 | 21507 | 406 | 53  | 2829 | 8  |     |    | 745 | 29  |     |     | 2276 | 9  |
| Miller <sup>10</sup>  | 3xmRNA +bivalent                      | Vac only               | 15 | 40515 | 508 | 80  | 3693 | 11 |     |    | 883 | 46  |     |     | 2399 | 17 |
| Qu <sup>8</sup>       | BA.4/5 inf (17-unvac)                 | Inf only               | 20 | 707   | 66  | 11  | 190  | 4  | 180 | 4  | 210 | 3   |     |     | 162  | 4  |
| Qu <sup>8</sup>       | BA.4/5 inf (17-unvac)--BQ.1           | Inf only               | 20 |       | 68  | 10  |      |    |     |    |     |     |     |     |      |    |
| Qu <sup>8</sup>       | Hosp BA.1 (6-unvac;5-2xmRNAvac)       | Inf only               | 15 | 720   | 145 | 5   | 263  | 3  | 205 | 4  | 186 | 4   |     |     | 227  | 3  |
| Qu <sup>8</sup>       | Hosp BA.1 (6-unvac;5-2xmRNAvac)--BQ.1 | Inf only               | 15 |       | 135 | 5   |      |    |     |    |     |     |     |     |      |    |
| Zou <sup>9</sup>      | 3xBNT162b2+BTI                        | reboost with BNT162b   | 20 | 2516  | 60  | 42  | 226  | 11 | 283 | 9  | 126 | 20  | 55  | 46  |      |    |
| Zou <sup>9</sup>      | 3xBNT162b2 +BTI                       | preboost with bivalent | 19 | 1377  | 74  | 19  | 207  | 7  | 282 | 5  | 62  | 22  | 27  | 51  |      |    |
| Zou <sup>9</sup>      | 3xBNT162b2                            | preboost with bivalent | 18 | 226   | 11  | 21  | 20   | 11 | 24  | 9  | 14  | 16  | 12  | 19  |      |    |
| Zou <sup>9</sup>      | 3xBNT162b2                            | Preboost with BNT162b  | 20 | 303   | 17  | 18  | 30   | 10 | 36  | 8  | 18  | 17  | 13  | 23  |      |    |
| Miller <sup>10</sup>  | 2xBNT162b2                            | Preboost with BNT162b  | 16 | 484   | 20  | 24  | 20   | 24 |     |    | 20  | 24  |     |     | 20   | 24 |

|                      |        |                          |    |      |    |     |     |    |  |  |     |     |  |  |     |    |
|----------------------|--------|--------------------------|----|------|----|-----|-----|----|--|--|-----|-----|--|--|-----|----|
| Miller <sup>10</sup> | 3xmRNA | preboost with bivalent   | 15 | 3633 | 45 | 81  | 211 | 17 |  |  | 33  | 110 |  |  | 131 | 28 |
| Miller <sup>10</sup> | 3xmRNA | preboost with monovalent | 18 | 5731 | 49 | 117 | 184 | 31 |  |  | 117 | 49  |  |  | 168 | 34 |

353  
354  
355  
356  
357  
358  
359  
360  
361  
362  
363  
364  
365  
366  
367  
368  
369  
370  
371  
372  
373  
374  
375  
376  
377  
378  
379

380 Supplementary Table 3

381 Neutralizing activity numbers (#) by study cohort.

|                       | Vaccine and COVID-19 history at sample time | Group    | WA-1 # | WA-1 neutralizing # | BQ.1.1 # | BQ.1.1 neutralizing # | BA.4/5 # | BA.4/5 neutralizing # | BA.4.6 # | BA.4.6 neutralizing # | BA.2.75 # | BA.2.75 neutralizing # | XB B.1 # | XBB.1 neutralizing # | BF.7 # | BF.7 neutralizing # |
|-----------------------|---------------------------------------------|----------|--------|---------------------|----------|-----------------------|----------|-----------------------|----------|-----------------------|-----------|------------------------|----------|----------------------|--------|---------------------|
| Cao <sup>3</sup>      | 3xCorVac+BA.1 BTI                           | VaxCCP   | 50     | 50                  |          |                       | 50       | 50                    |          |                       | 50        | 50                     |          |                      | 50     | 49                  |
| Cao <sup>3</sup>      | 3xCorVac +BA.2 BTI                          | VaxCCP   | 39     | 39                  |          |                       | 39       | 39                    |          |                       | 39        | 39                     |          |                      | 39     | 38                  |
| Cao <sup>3</sup>      | 3xCorVac +BA.5 BTI                          | VaxCCP   | 36     | 36                  |          |                       | 36       | 36                    |          |                       | 36        | 36                     |          |                      | 36     | 36                  |
| Zou <sup>9</sup>      | 4xBNT162b2+BTI                              | VaxCCP   | 20     | 20                  | 20       | 20                    | 20       | 20                    | 20       | 20                    | 20        | 20                     | 20       | 19                   |        |                     |
| Planas <sup>11</sup>  | 3xmRNAvac+ BA.1/2 BTI                       | VaxCCP   | 13     | 13                  | 13       | 11                    | 13       | 12                    | 13       | 13                    | 13        | 11                     |          |                      |        |                     |
| Wang <sup>14</sup>    | 2-3xmRNAvac+ BA.2 BTI                       | VaxCCP   | 14     | 14                  | 14       | 13                    | 14       | 14                    |          |                       |           |                        | 14       | 8                    |        |                     |
| Wang <sup>14</sup>    | 2-3xmRNAvac+ BA.2 BTI--BQ.1                 | VaxCCP   |        |                     | 14       | 13                    |          |                       |          |                       |           |                        |          |                      |        |                     |
| Wang <sup>14</sup>    | 3-4xmRNAvac+ BA.4/5 BTI                     | VaxCCP   | 20     | 20                  | 20       | 18                    | 20       | 20                    |          |                       |           |                        | 20       | 14                   |        |                     |
| Wang <sup>14</sup>    | 3-4xmRNAvac+ BA.4/5 BTI--BQ.1               | VaxCCP   |        |                     | 20       | 20                    |          |                       |          |                       |           |                        |          |                      |        |                     |
| Kurhade <sup>13</sup> | 3xmRNAvac+bivalent+BTI                      | VaxCCP   | 23     | 23                  | 23       | 22                    | 23       | 23                    | 23       | 23                    | 23        | 23                     | 23       | 22                   | 23     | 23                  |
| Zou <sup>9</sup>      | 3xBNT162b2+bivalent+BTI                     | VaxCCP   | 19     | 19                  | 19       | 19                    | 19       | 19                    | 19       | 19                    | 19        | 20                     | 19       | 19                   |        |                     |
| Planas <sup>11</sup>  | 3xmRNAvac+ BA.1/2 BTI                       | VaxCCP   | 16     | 16                  | 16       | 16                    | 16       | 16                    | 16       | 16                    | 16        | 16                     |          |                      |        |                     |
| Planas <sup>11</sup>  | 3xmRNAvac+ BA.5 BTI                         | VaxCCP   | 15     | 15                  | 15       | 15                    | 15       | 15                    | 15       | 15                    | 15        | 15                     |          |                      |        |                     |
| Davis <sup>12</sup>   | 3xmRNAvac                                   | Vac only | 12     | 12                  | 12       | 6                     | 12       | 11                    |          |                       | 12        | 9                      |          |                      |        |                     |
| Kurhade <sup>13</sup> | 4xmRNAvac                                   | Vac only | 25     | 25                  | 25       | 15                    | 25       | 23                    | 25       | 22                    | 25        | 17                     | 25       | 8                    | 25     | 21                  |
| Cao <sup>3</sup>      | 3xCorVac                                    | Vac only | 40     | 40                  |          |                       | 40       | 39                    |          |                       | 40        | 40                     |          |                      | 40     | 37                  |
| Zou <sup>9</sup>      | 4xBNT162b2                                  | Vac only | 20     | 20                  | 20       | 15                    | 20       | 8                     | 20       | 19                    | 20        | 19                     | 20       | 10                   |        |                     |
| Planas <sup>11</sup>  | 3xmRNAvac                                   | Vac only | 10     | 10                  | 10       | 6                     | 10       | 7                     | 10       | 5                     | 10        | 3                      |          |                      |        |                     |
| Wang <sup>14</sup>    | 3xmRNAvac                                   | Vac only | 14     | 14                  | 14       | 5                     | 14       | 14                    |          |                       |           |                        | 14       | 3                    |        |                     |
| Wang <sup>14</sup>    | 3xmRNAvac--BQ.1                             | Vac only |        |                     | 14       | 6                     |          |                       |          |                       |           |                        |          |                      |        |                     |
| Wang <sup>14</sup>    | 3xmRNAvac+monovalent                        | Vac only | 19     | 19                  | 19       | 15                    | 19       | 19                    |          |                       |           |                        | 19       | 8                    |        |                     |
| Wang <sup>14</sup>    | 3xmRNAvac+monovalent--BQ.1                  | Vac only |        |                     | 19       | 16                    |          |                       |          |                       |           |                        |          |                      |        |                     |
| Wang <sup>14</sup>    | 3xmRNAvac+bivalent                          | Vac only | 21     | 21                  | 21       | 16                    | 21       | 21                    |          |                       |           |                        | 21       | 9                    |        |                     |
| Wang <sup>14</sup>    | 3xmRNAvac+bivalent--BQ.1                    | Vac only |        |                     | 21       | 18                    |          |                       |          |                       |           |                        |          |                      |        |                     |
| Davis <sup>12</sup>   | 3xmRNAvac+monovalent                        | Vac only | 12     | 12                  | 12       | 9                     | 12       | 12                    |          |                       | 12        | 10                     |          |                      |        |                     |
| Kurhade <sup>13</sup> | 3xmRNAvac+bivalent                          | Vac only | 29     | 29                  | 29       | 26                    | 29       | 29                    | 29       | 28                    | 29        | 28                     | 29       | 20                   | 29     | 28                  |
| Davis <sup>12</sup>   | 3xmRNAvac+bivalent                          | Vac only | 12     | 12                  | 12       | 10                    | 12       | 12                    |          |                       | 12        | 11                     |          |                      |        |                     |
| Qu <sup>8</sup>       | 3xmRNAvac--BQ.1                             | Vac only |        |                     | 15       | 14                    |          |                       |          |                       |           |                        |          |                      |        |                     |
| Qu <sup>8</sup>       | 3xmRNAvac                                   | Vac only | 15     | 15                  | 15       | 12                    | 15       | 15                    | 15       | 15                    | 15        | 14                     |          |                      | 15     | 14                  |

|                      |                                           |                                |    |    |    |    |    |    |    |    |    |    |    |    |    |    |
|----------------------|-------------------------------------------|--------------------------------|----|----|----|----|----|----|----|----|----|----|----|----|----|----|
| Zou <sup>9</sup>     | 3xBNT162b2+bivalent                       | Vac only                       | 18 | 18 | 19 | 18 | 18 | 18 | 19 | 19 | 19 | 18 | 19 | 18 |    |    |
| Planas <sup>11</sup> | 3xmRNAvac                                 | Vac only                       | 18 | 18 | 18 | 16 | 18 | 18 | 18 | 18 | 18 | 13 |    |    |    |    |
| Miller <sup>10</sup> | 3xBNT162b2                                | Vac only                       | 16 | 16 | 16 | 16 | 16 | 16 |    |    | 16 | 16 |    |    | 16 | 16 |
| Miller <sup>10</sup> | 3xmRNA+ monovalent                        | Vac only                       | 18 | 18 | 18 | 18 | 18 | 18 |    |    | 18 | 18 |    |    | 18 | 18 |
| Miller <sup>10</sup> | 3xmRNA +bivalent                          | Vac only                       | 15 | 15 | 15 | 15 | 15 | 15 |    |    | 15 | 15 |    |    | 15 | 15 |
| Qu <sup>8</sup>      | BA.4/5 inf (17-unvac)                     | Inf only                       | 20 | 20 | 20 | 12 | 20 | 15 | 20 | 14 | 20 | 15 |    |    | 20 | 14 |
| Qu <sup>8</sup>      | BA.4/5 inf (17-unvac)--<br>BQ.1           | Inf only                       |    |    | 20 | 11 |    |    |    |    |    |    |    |    |    |    |
| Qu <sup>8</sup>      | Hosp BA.1 (6-unvac;5-<br>2xmRNAvac)       | Inf only                       | 15 | 14 | 15 | 13 | 15 | 11 | 15 | 12 | 15 | 8  |    |    | 15 | 14 |
| Qu <sup>8</sup>      | Hosp BA.1 (6-unvac;5-<br>2xmRNAvac)--BQ.1 | Inf only                       |    |    | 15 | 14 |    |    |    |    |    |    |    |    |    |    |
| Zou <sup>9</sup>     | 3xBNT162b2+BTI                            | reboost<br>with<br>BNT162b     | 20 | 20 | 20 | 16 | 20 | 19 | 20 | 19 | 20 | 17 | 20 | 17 |    |    |
| Zou <sup>9</sup>     | 3xBNT162b2 +BTI                           | preboost<br>with<br>bivalent   | 19 | 19 | 19 | 16 | 19 | 19 | 19 | 19 | 19 | 17 | 19 | 12 |    |    |
| Zou <sup>9</sup>     | 3xBNT162b2                                | preboost<br>with<br>bivalent   | 18 | 18 | 19 | 1  | 18 | 9  | 19 | 9  | 19 | 5  | 19 | 2  |    |    |
| Zou <sup>9</sup>     | 3xBNT162b2                                | Preboost<br>with<br>BNT162b    | 20 | 19 | 20 | 6  | 20 | 12 | 20 | 12 | 20 | 8  | 20 | 5  |    |    |
| Miller <sup>10</sup> | 2xBNT162b2                                | Preboost<br>with<br>BNT162b    | 16 | 16 | 16 | 6  | 16 | 5  |    |    | 16 | 7  |    |    | 16 | 4  |
| Miller <sup>10</sup> | 3xmRNA                                    | preboost<br>with<br>bivalent   | 15 | 15 | 15 | 13 | 15 | 15 |    |    | 15 | 9  |    |    | 15 | 14 |
| Miller <sup>10</sup> | 3xmRNA                                    | preboost<br>with<br>monovalent | 18 | 18 | 18 | 15 | 18 | 18 |    |    | 18 | 18 |    |    | 18 | 17 |



### 383 Supplementary Figure 1

384 Plasma GMT<sub>50</sub> from post boosted vaccinations and COVID-19 sorted by study cohort with live virus  
385 assays on the left and pseudovirus on right, with individual sample minimum and maximum  
386 dilution titer also shown. A) WA-1; B) BQ.1.1; C) BA.2.75; D) BA.4/5.

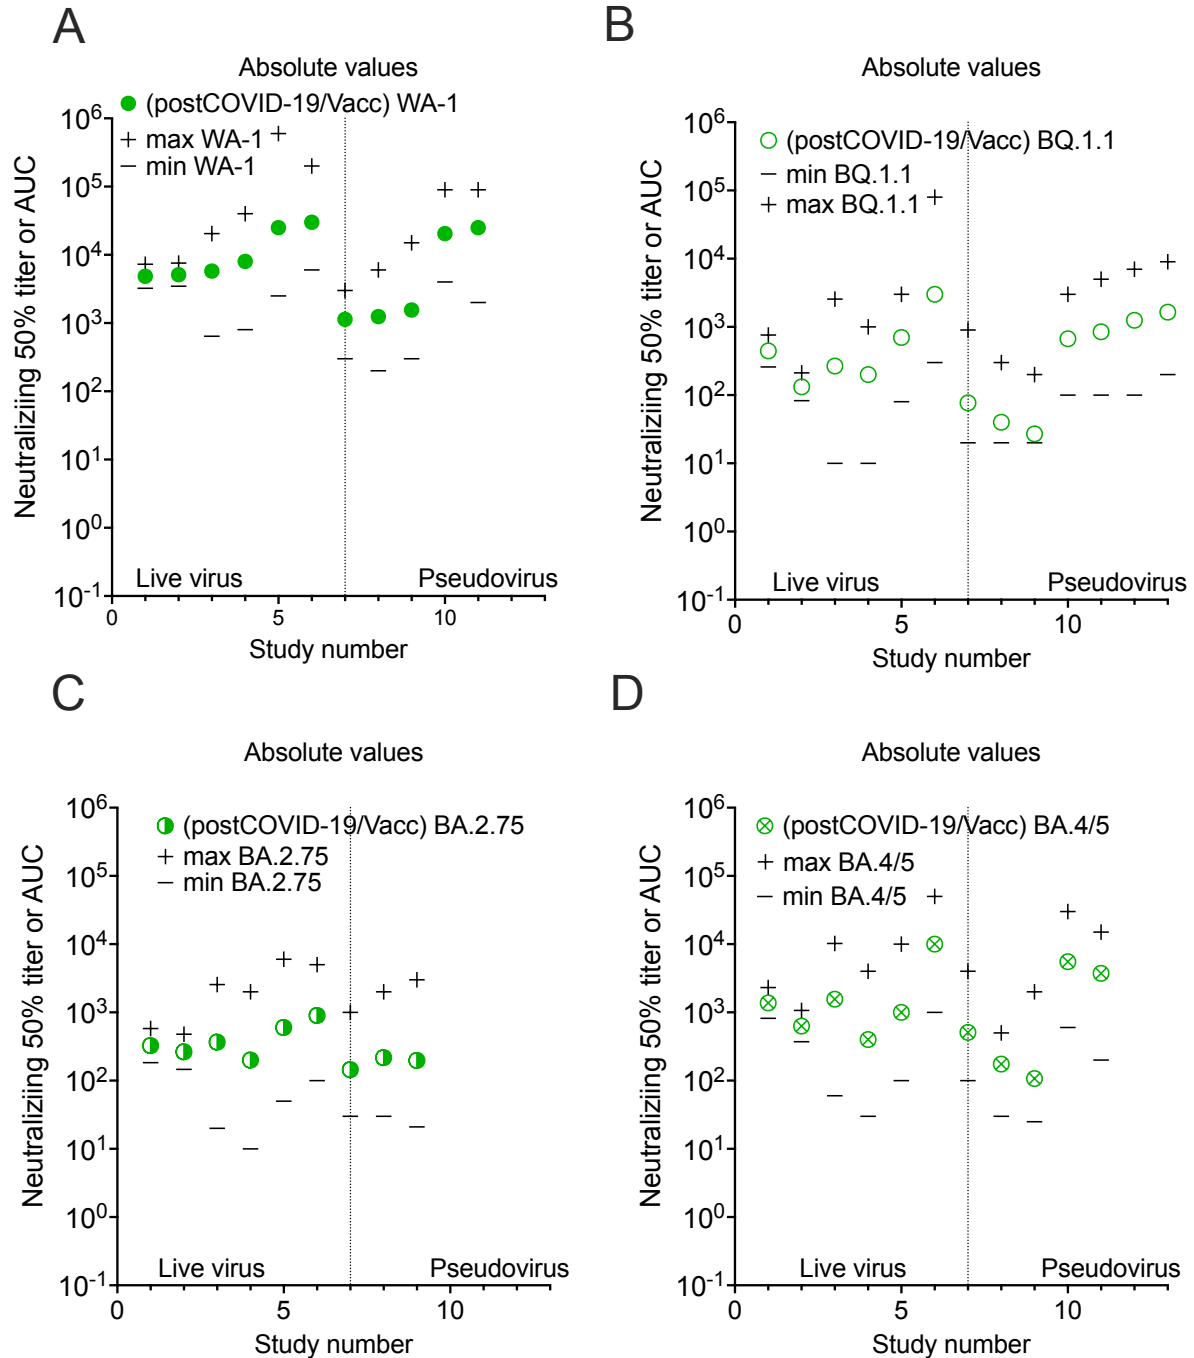

387  
388  
389

390 **Supplementary Figure 2**

391 Plasma GMT<sub>50</sub> from boosted vaccinations only without COVID-19 sorted by study cohort with  
392 live virus assays on the left and pseudovirus on right with with individual sample minimum and  
393 maximum dilution titer also shown. A) WA-1; B) BQ.1.1; C) BA.2.75; and D) BA.4/5.

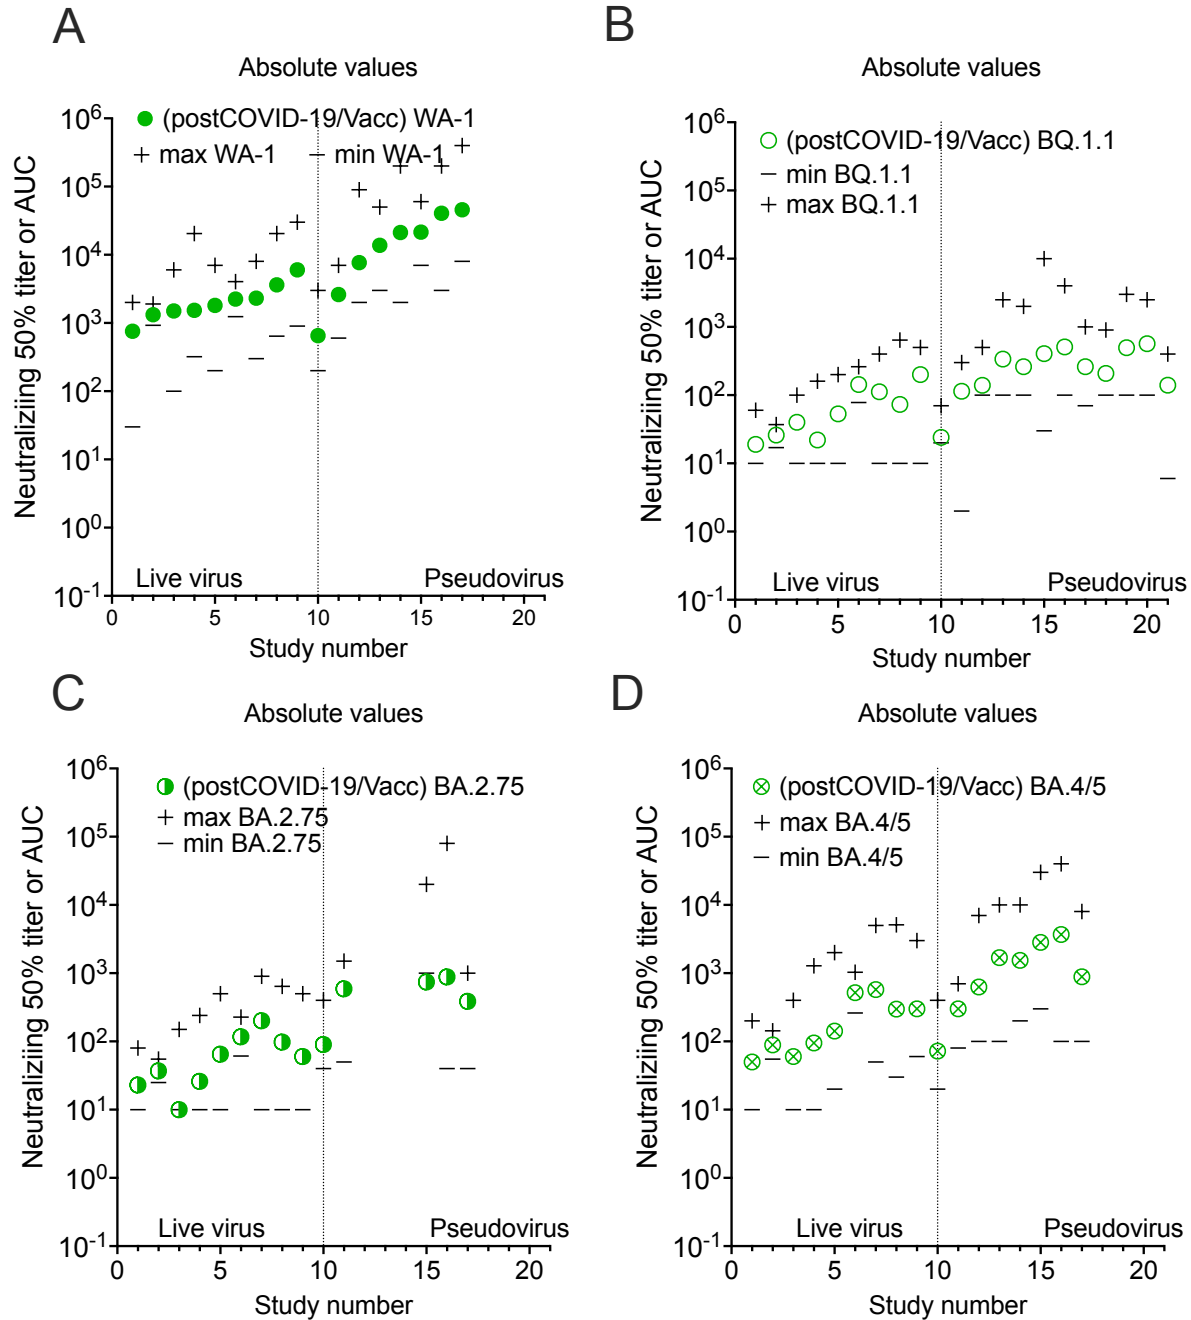

394  
395  
396  
397  
398  
399

400 **Supplementary Figure 3**

401 Plasma GMT<sub>50</sub> from Omicron infection alone and also pre-boosted in 2021 or 2022 6 to 11 months  
 402 after last vaccine dose sampled sorted by study cohort with live virus assays on the left and  
 403 pseudovirus on right with minimum and maximum dilution titer also shown. A) WA-1; B) BQ.1.1;  
 404 C) BA.2.75; and D) BA.4/5.  
 405

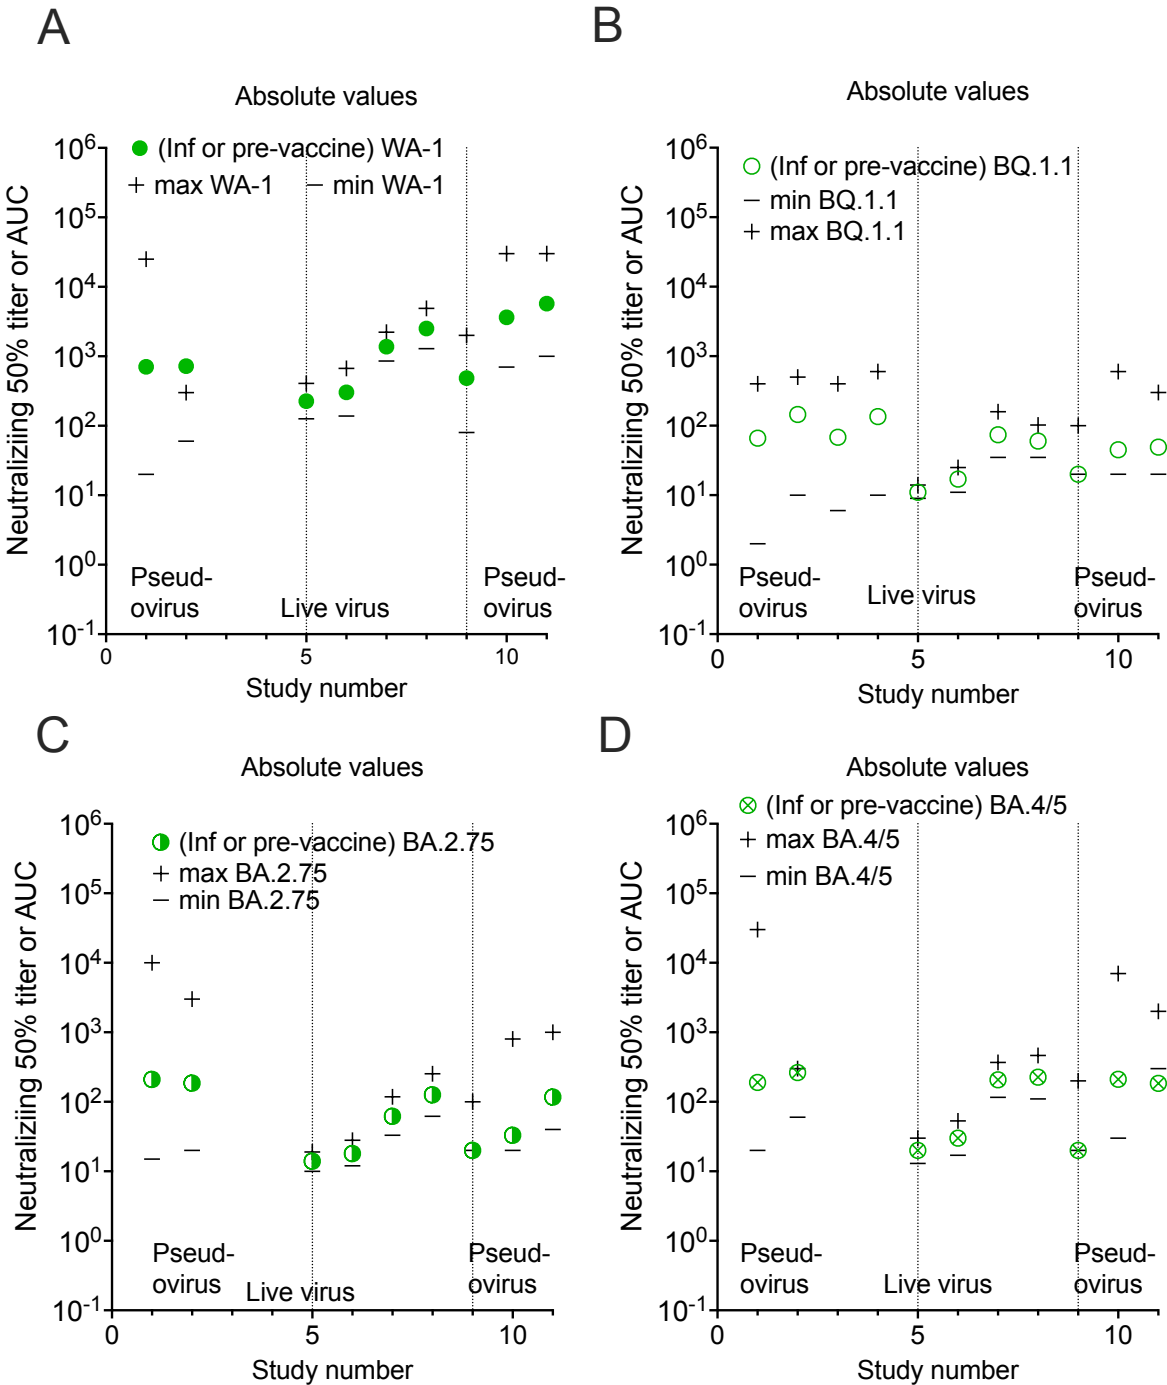

406
